# Supplementary material for: Effect of probiotic supplementation on total lactobacilli, bifidobacteria and short chain fatty acids in 2–5-year-old children
Source: PubMed Central journal article supplement (PMC5443088; doi:10.1080/16512235.2017.1298340), 2017-03-10
Supplement: zmeh_a_1298340_sm2481.pdf [file zmeh_a_1298340_sm2481.pdf]

## Supplemental material

Table S1: Faecal bacteria and SCFAs in children (2 -5 years) by gender at baseline.

|                             | <b>Male (n=67)</b> | <b>Female (N=73)</b> | <b>Total (n=140)</b> |
|-----------------------------|--------------------|----------------------|----------------------|
| <b>Total bacteria</b>       | 10.24±0.46         | 10.35±0.31           | 10.29±0.39           |
| <i>Lactobacillus</i>        | 9.75±1.40          | 9.94±1.14            | 9.85±1.27            |
| <i>Bifidobacterium</i>      | 8.94±0.95          | 9.10±0.52            | 9.03±0.76            |
| <b>Acetic acid</b>          | 73.44±27.31        | 75.01±23.53          | 74.24±25.36          |
| <b>Propionic acid</b>       | 37.78±22.46        | 38.6±18.36           | 38.2±20.39           |
| <b>Butyric acid</b>         | 24.76±15.41        | 22.98±11.98          | 23.84±13.71          |
| <b>Valeric acid</b>         | 4.35±4.23          | 3.18±3.20            | 3.74±3.76            |
| <b>Isobutyric acid</b>      | 1.46±1.68          | 1.29±1.09            | 1.38±1.41            |
| <b>2-methylbutyric acid</b> | 0.95±1.13          | 0.71±0.67            | 0.83±0.92            |
| <b>Isovaleric acid</b>      | 1.51±1.51          | 1.33±0.93            | 1.42±1.24            |
| <b>Lactic acid</b>          | 16.85±32.01        | 10.18±18.82          | 13.20±25.75          |

<sup>1</sup>Bacterial counts expressed as log<sub>10</sub>/gram of faecal sample.

<sup>2</sup>SCFA Values are mean given in mmol/kg wet weight faeces

Table S2: Lactobacilli, bifidobacteria and SCFA in relation to nutritional status of children (2-5 years) at baseline.

|                             | Weight for Age |                                   |                                 | P-value |
|-----------------------------|----------------|-----------------------------------|---------------------------------|---------|
|                             | Normal<br>N=89 | Moderately<br>Underweight<br>N=36 | Severely<br>Underweight<br>N=15 |         |
| <b>Total bacteria</b>       | 10.28±0.38     | 10.32±0.42                        | 10.42±0.34                      | 0.19    |
| <i>Lactobacillus</i>        | 9.79±1.30      | 9.93±1.22                         | 10.57±0.79                      | 0.03    |
| <i>Bifidobacterium</i>      | 9.06±0.68      | 8.96±0.70                         | 9.15±0.43                       | 0.62    |
| <b>Acetic acid</b>          | 75.96±24.5     | 71.7±27.0                         | 70.51±23.89                     | 0.43    |
| <b>Propionic acid</b>       | 38.24±18.91    | 38.3±23.2                         | 39.20±17.24                     | 0.85    |
| <b>Butyric acid</b>         | 24.54±13.88    | 22.36±13.26                       | 20.80±8.13                      | 0.38    |
| <b>Valeric acid</b>         | 3.55±3.98      | 4.07±3.46                         | 4.15±3.48                       | 0.58    |
| <b>Isobutyric acid</b>      | 1.25±1.49      | 1.57±1.24                         | 1.55±1.19                       | 0.46    |
| <b>2-methylbutyric acid</b> | 0.75±1.01      | 0.95±0.77                         | 0.81±0.65                       | 0.83    |
| <b>Isovaleric acid</b>      | 1.30±1.35      | 1.57±1.07                         | 1.48±0.91                       | 0.62    |
| <b>Lactic acid</b>          | 13.17±25.99    | 13.42±25.91                       | 14.86±22.49                     | 0.81    |

<sup>1</sup>Bacterial counts expressed as log<sub>10</sub>/gram of fecal sample.

<sup>2</sup>SCFA Values are mean given in mmol/kg wet weight faeces

WAZ: weight for age Z score. WAZ >-2 SD was considered Normal; WAZ ≤-2 to -3 was considered Moderately Underweight; WAZ <-3 SD was considered Severely Underweight

**Table S3 After *L. paracasei* Lpc-37 supplementation.** Correlation of short chain fatty acids and faecal bacteria in children at the beginning of the study; baseline. (N=51). Bold values indicate statistically significant correlations, after Bonferroni correction.

|                     |   | tot bac     | Lacto bacillus | <i>L. paracasei</i> | Bifido bacterium | <i>B. lactis</i> | Aceticacid  | Propionicacid | Butyric acid | Valeric acid | Isobutyricacid | 2methylbutyricacid | Isovaleric acid | Lacticacid |
|---------------------|---|-------------|----------------|---------------------|------------------|------------------|-------------|---------------|--------------|--------------|----------------|--------------------|-----------------|------------|
| Total bacteria      | r | 1.000       | -.023          | -.023               | .277             | .445             | -.115       | -.010         | .173         | .358         | .569           | .384               | .586            | -.116      |
|                     | p | <b>0</b>    | .873           | .877                | .049             | <b>.001</b>      | .435        | .947          | .238         | .016         | <b>.000</b>    | .009               | <b>.000</b>     | .465       |
| Lactobacillus       | r | -.023       | 1.000          | -.006               | .282             | .213             | .219        | .214          | .251         | .307         | -.037          | -.102              | .036            | -.014      |
|                     | p | .873        | <b>0</b>       | .970                | .045             | .142             | .136        | .144          | .085         | .040         | .807           | .503               | .815            | .929       |
| <i>L. paracasei</i> | r | -.023       | -.006          | 1.000               | .330             | .120             | -.066       | -.143         | -.096        | .196         | .002           | -.059              | -.020           | .053       |
|                     | p | .877        | .970           | <b>0</b>            | .022             | .423             | .668        | .349          | .532         | .213         | .991           | .712               | .899            | .742       |
| Bifidobacterium     | r | .277        | .282           | .330                | 1.000            | .449             | .015        | -.015         | .066         | .082         | .118           | .103               | .216            | -.120      |
|                     | p | .049        | .045           | .022                | <b>0</b>         | <b>.001</b>      | .917        | .918          | .655         | .592         | .434           | .501               | .154            | .448       |
| <i>B. lactis</i>    | r | .445        | .213           | .120                | .449             | 1.000            | -.087       | -.010         | .156         | .156         | .206           | .185               | .186            | .043       |
|                     | p | .001        | .142           | .423                | .001             | <b>0</b>         | .562        | .948          | .295         | .313         | .176           | .229               | .226            | .790       |
| Aceticacid          | r | -.115       | .219           | -.066               | .015             | -.087            | 1.000       | .858          | .738         | .305         | -.232          | -.392              | -.235           | -.167      |
|                     | p | .435        | .136           | .668                | .917             | .562             | <b>0</b>    | <b>.000</b>   | <b>.000</b>  | .039         | .116           | .007               | .116            | .284       |
| Propionicacid       | r | -.010       | .214           | -.143               | -.015            | -.010            | .858        | 1.000         | .696         | .224         | -.357          | -.547              | -.432           | -.046      |
|                     | p | .947        | .144           | .349                | .918             | .948             | <b>.000</b> | <b>0</b>      | <b>.000</b>  | .135         | .014           | <b>.000</b>        | <b>.003</b>     | .768       |
| Butyricacid         | r | .173        | .251           | -.096               | .066             | .156             | .738        | .696          | 1.000        | .342         | .004           | -.181              | .001            | -.140      |
|                     | p | .238        | .085           | .532                | .655             | .295             | <b>.000</b> | <b>.000</b>   | <b>0</b>     | .020         | .981           | .229               | .993            | .371       |
| Valericacid         | r | .358        | .307           | .196                | .082             | .156             | .305        | .224          | .342         | 1.000        | .471           | .240               | .290            | -.045      |
|                     | p | .016        | .040           | .213                | .592             | .313             | .039        | .135          | .020         | <b>0</b>     | <b>.001</b>    | .117               | .053            | .781       |
| Isobutyricacid      | r | .569        | -.037          | .002                | .118             | .206             | -.232       | -.357         | .004         | .471         | 1.000          | .933               | .826            | -.284      |
|                     | p | <b>.000</b> | .807           | .991                | .434             | .176             | .116        | .014          | .981         | <b>.001</b>  | <b>0</b>       | <b>.000</b>        | <b>.000</b>     | .072       |
| 2methylbutyricacid  | r | .384        | -.102          | -.059               | .103             | .185             | -.392       | -.547         | -.181        | .240         | .933           | 1.000              | .811            | -.057      |
|                     | p | .009        | .503           | .712                | .501             | .229             | .007        | <b>.000</b>   | .229         | .117         | <b>.000</b>    | <b>0</b>           | <b>.000</b>     | .728       |
| Isovalericacid      | r | .586        | .036           | -.020               | .216             | .186             | -.235       | -.432         | .001         | .290         | .826           | .811               | 1.000           | -.299      |
|                     | p | <b>.000</b> | .815           | .899                | .154             | .226             | .116        | <b>.003</b>   | .993         | .053         | <b>.000</b>    | <b>.000</b>        | <b>0</b>        | .061       |

|            |   |       |       |      |       |      |       |       |       |       |       |       |       |          |
|------------|---|-------|-------|------|-------|------|-------|-------|-------|-------|-------|-------|-------|----------|
| Lacticacid | r | -.116 | -.014 | .053 | -.120 | .043 | -.167 | -.046 | -.140 | -.045 | -.284 | -.057 | -.299 | 1.000    |
|            | p | .465  | .929  | .742 | .448  | .790 | .284  | .768  | .371  | .781  | .072  | .728  | .061  | <b>0</b> |

**Table S4 After *B. lactis* HN019 supplementation.** Correlation of short chain fatty acids and faecal bacteria in children at the beginning of the study; baseline. (N=44). Bold values indicate statistically significant correlations, after Bonferroni correction.

|                  |   | tot bac     | Lacto bacillus | L. paracasei | Bifidobacterium | <i>B. lactis</i> | Aceticacid  | Propionicacid | Butyricacid | Valericacid | Isobutyricacid | 2methylbutyricacid | Isovalericacid | Lactica acid |
|------------------|---|-------------|----------------|--------------|-----------------|------------------|-------------|---------------|-------------|-------------|----------------|--------------------|----------------|--------------|
| Total bacteria   | r | 1.000       | .295           | .467         | .487            | .320             | -.348       | -.131         | .050        | .657        | .847           | .782               | .884           | -.257        |
|                  | p | <b>0</b>    | .052           | .021         | <b>.001</b>     | .034             | <b>.028</b> | .421          | .761        | <b>.000</b> | <b>.000</b>    | <b>.000</b>        | <b>.000</b>    | .148         |
| Lactobacillus    | r | .295        | 1.000          | 0.000        | .497            | .180             | -.279       | -.210         | .005        | .343        | .445           | .501               | .500           | .050         |
|                  | p | .052        | <b>0</b>       | 1.000        | <b>.001</b>     | .243             | .081        | .194          | .978        | .032        | <b>.005</b>    | <b>.002</b>        | <b>.001</b>    | .782         |
| L. paracasei     | r | .467        | 0.000          | 1.000        | .348            | .151             | -.074       | .191          | -.027       | .588        | .311           | -.085              | .395           | -.414        |
|                  | p | .021        | 1.000          | <b>0</b>     | .096            | .480             | .758        | .420          | .910        | .008        | .196           | .747               | .094           | .098         |
| Bifidobacterium  | r | .487        | .497           | .348         | 1.000           | .239             | -.096       | -.141         | .243        | .331        | .444           | .299               | .446           | -.172        |
|                  | p | <b>.001</b> | <b>.001</b>    | .096         | <b>0</b>        | .119             | .554        | .386          | .130        | .040        | .005           | .077               | <b>.004</b>    | .339         |
| <i>B. lactis</i> | r | .320        | .180           | .151         | .239            | 1.000            | -.118       | -.082         | .137        | .287        | .290           | .153               | .269           | -.323        |
|                  | p | .034        | .243           | .480         | .119            | <b>0</b>         | .468        | .617          | .400        | .077        | .073           | .373               | .097           | .067         |
| Aceticacid       | r | -.348       | -.279          | -.074        | -.096           | -.118            | 1.000       | .708          | .307        | -.100       | -.261          | -.502              | -.344          | .174         |
|                  | p | .028        | .081           | .758         | .554            | .468             | <b>0</b>    | <b>.000</b>   | .051        | .539        | .103           | <b>.002</b>        | .030           | .325         |
| Propionicacid    | r | -.131       | -.210          | .191         | -.141           | -.082            | .708        | 1.000         | .345        | .072        | -.163          | -.369              | -.127          | .076         |
|                  | p | .421        | .194           | .420         | .386            | .617             | <b>.000</b> | <b>0</b>      | .027        | .660        | .315           | .024               | .434           | .671         |
| Butyricacid      | r | .050        | .005           | -.027        | .243            | .137             | .307        | .345          | 1.000       | .118        | -.053          | -.229              | .090           | -.055        |
|                  | p | .761        | .978           | .910         | .130            | .400             | .051        | .027          | <b>0</b>    | .469        | .747           | .172               | .581           | .759         |
| Valericacid      | r | .657        | .343           | .588         | .331            | .287             | -.100       | .072          | .118        | 1.000       | .698           | .511               | .645           | -.348        |
|                  | p | <b>.000</b> | .032           | .008         | .040            | .077             | .539        | .660          | .469        | <b>0</b>    | <b>.000</b>    | <b>.001</b>        | <b>.000</b>    | .048         |
| Isobutyricacid   | r | .847        | .445           | .311         | .444            | .290             | -.261       | -.163         | -.053       | .698        | 1.000          | .922               | .897           | -.35         |
|                  | p | <b>.000</b> | .005           | .196         | .005            | .073             | .103        | .315          | .747        | <b>.000</b> | <b>0</b>       | <b>.000</b>        | <b>.000</b>    | .044         |

|                     |   |             |             |       |             |       |             |       |              |              |              |              |              |              |
|---------------------|---|-------------|-------------|-------|-------------|-------|-------------|-------|--------------|--------------|--------------|--------------|--------------|--------------|
| 2methylbutyric acid | r | .782        | .501        | -.086 | .299        | .153  | -.502       | -.369 | -.229        | .511         | .922         | 1.000        | .883         | -.162        |
|                     | p | <b>.000</b> | <b>.002</b> | .747  | .077        | .373  | <b>.002</b> | .024  | .172         | <b>.001</b>  | <b>.000</b>  | <b>0</b>     | <b>.000</b>  | .393         |
| Isovaleric acid     | r | .884        | .500        | .395  | .446        | .269  | -.344       | -.127 | .090         | .645         | .897         | .883**       | 1.000        | -.200        |
|                     | p | <b>.000</b> | <b>.001</b> | .094  | <b>.004</b> | .097  | .030        | .434  | .581         | <b>.000</b>  | <b>.000</b>  | <b>.000</b>  | <b>0</b>     | .265         |
| Lactic acid         | r | -.257       | .050        | -.414 | -.172       | -.323 | .174        | .076  | <b>-.055</b> | <b>-.348</b> | <b>-.353</b> | <b>-.162</b> | <b>-.200</b> | <b>1.000</b> |
|                     | p | .148        | .782        | .098  | .339        | .067  | .325        | .671  | .759         | .048         | .044         | .393         | .265         | <b>0</b>     |

**Table S5. After placebo supplementation.** Correlation of short chain fatty acids and faecal bacteria in children at the beginning of the study; baseline. (N=44). Bold values indicate statistically significant correlations, after Bonferroni correction.

|                 |   | tot bac     | Lacto bacillus | L. paracasei | Bifidobacterium | B. lactis    | Acetic acid | Propionic acid | Butyric acid | Valeric acid | Isobutyric acid | 2methylbutyric acid | Isovaleric acid | Lactic acid |
|-----------------|---|-------------|----------------|--------------|-----------------|--------------|-------------|----------------|--------------|--------------|-----------------|---------------------|-----------------|-------------|
| Total bacteria  | r | 1.000       | .131           | .314         | .500            | .112         | -.367       | -.265          | -.111        | .662         | .743            | .753                | .700            | -.613       |
|                 | p | <b>0</b>    | .410           | .127         | <b>.001</b>     | .480         | .016        | .086           | .480         | <b>.000</b>  | <b>.000</b>     | <b>.000</b>         | <b>.000</b>     | <b>.000</b> |
| Lactobacillus   | r | .131        | 1.000          | .159         | .387            | .147         | -.325       | -.290          | -.010        | .235         | .155            | .233                | .040            | -.128       |
|                 | p | .410        | <b>0</b>       | .447         | .011            | .360         | .038        | .066           | .950         | .145         | .346            | .153                | .802            | .438        |
| L. paracasei    | r | .314        | .159           | 1.000        | .152            | -.069        | -.284       | -.268          | .041         | .052         | .324            | .376                | .503            | -.440       |
|                 | p | .127        | .447           | <b>0</b>     | .467            | .742         | .178        | .206           | .850         | .809         | .131            | .070                | .012            | .031        |
| Bifidobacterium | r | .500        | .387           | .152         | 1.000           | .147         | -.321       | -.406          | -.138        | .230         | .181            | .208                | .223            | -.444       |
|                 | p | <b>.001</b> | .011           | .467         | <b>0</b>        | .360         | .036        | <b>.007</b>    | .378         | .143         | .258            | .191                | .151            | <b>.004</b> |
| B. lactis       | r | .112        | .147           | -.069        | .147            | 1.000        | -.180       | -.382          | -.198        | .174         | .257            | .189                | .134            | .024        |
|                 | p | .480        | .360           | .742         | .360            | <b>0</b>     | .261        | .014           | .216         | .282         | .115            | .249                | .404            | .887        |
| Acetic acid     | r | -.367       | -.325          | -.284        | -.321           | -.180        | 1.000       | .761           | .416         | -.017        | -.242           | -.447               | -.236           | .245        |
|                 | p | .016        | .038           | .178         | .036            | .261         | <b>0</b>    | <b>.000</b>    | .006         | .914         | .128            | <b>.003</b>         | .127            | .127        |
| Propionic acid  | r | -.265       | -.290          | -.268        | -.406           | <b>-.382</b> | .761        | 1.000          | .521         | -.017        | -.293           | -.421               | -.223           | .210        |
|                 | p | .086        | .066           | .206         | .007            | <b>.014</b>  | <b>.000</b> | <b>0</b>       | <b>.000</b>  | .914         | .063            | .006                | .151            | .194        |
| Butyric acid    | r | -.111       | -.010          | .041         | -.138           | -.198        | .416        | .521           | 1.000        | .100         | .029            | -.045               | -.062           | -.027       |
|                 | p | .480        | .950           | .850         | .378            | .216         | .006        | <b>.000</b>    | <b>0</b>     | .528         | .858            | .781                | .694            | .870        |

|                    |   |             |       |       |             |      |             |       |       |             |             |             |             |             |
|--------------------|---|-------------|-------|-------|-------------|------|-------------|-------|-------|-------------|-------------|-------------|-------------|-------------|
| Valericacid        | r | .662        | .235  | .052  | .230        | .174 | -.017       | -.017 | .100  | 1.000       | .771        | .705        | .556        | -.232       |
|                    | p | <b>.000</b> | .145  | .809  | .143        | .282 | .914        | .914  | .528  | <b>0</b>    | <b>.000</b> | <b>.000</b> | <b>.000</b> | <b>.000</b> |
| Isobutyricacid     | r | .743        | .155  | .324  | .181        | .257 | -.242       | -.293 | .029  | .771        | 1.000       | .948        | .773        | -.403       |
|                    | p | <b>.000</b> | .346  | .131  | .258        | .115 | .128        | .063  | .858  | <b>.000</b> | <b>0</b>    | <b>.000</b> | <b>.000</b> | <b>.000</b> |
| 2methylbutyricacid | r | .753        | .233  | .376  | .208        | .189 | -.447       | -.421 | -.045 | .705        | .948        | 1.000       | .817        | -.431       |
|                    | p | <b>.000</b> | .153  | .070  | .191        | .249 | <b>.003</b> | .006  | .781  | <b>.000</b> | <b>.000</b> | <b>0</b>    | <b>.000</b> | .007        |
| Isovalericacid     | r | .700        | .040  | .503  | .223        | .134 | -.236       | -.223 | -.062 | .556        | .773        | .817        | 1.000       | -.442       |
|                    | p | <b>.000</b> | .802  | .012  | .151        | .404 | .127        | .151  | .694  | <b>.000</b> | <b>.000</b> | <b>.000</b> | <b>0</b>    | <b>.004</b> |
| Lacticacid         | r | -.613       | -.128 | -.440 | -.444       | .024 | .245        | .210  | -.027 | -.232       | -.403       | -.431       | -.442       | 1.000       |
|                    | p | <b>.000</b> | .438  | .031  | <b>.004</b> | .887 | .127        | .194  | .870  | .155        | .012        | .007        | <b>.004</b> | <b>0</b>    |

Spearman rank correlation was performed to study the relation between all variables such as fecal bacteria and short chain fatty acids. r (rho) indicates correlations and p indicates significance at 95% CI. Significances are indicated in bold. \*Correlation is significant at the 0.05 level (2-tailed). \*\*Correlation is significant at the 0.01 level (2-tailed).
